# Supplementary material for: Monoclonal Antibodies against SARS-CoV-2 Infection: Results from a Real-Life Study before the Omicron Surge
Source: MDPI journal article supplement (doi:10.3390/vaccines10111895), 2022-11-10
Supplement: s1 [file s1]

**Supplementary Table S1.** Comparisons of clinical and laboratory parameters between T0 and T1

|                                                      | T0               | T1                |
|------------------------------------------------------|------------------|-------------------|
| <b>Oxygen supplementation needed (n, %)</b>          | 34 (18.4)        | 14 (7.6)          |
| <b>P/F ratio</b> (median, IQR)                       | 462 (452-467)    | 467 (457-471)     |
| <b>WBC</b> (cell/ $\mu$ L; median, IQR)              | 6360 (4450-8420) | 7480 (6165-10150) |
| <b>Lymphocyte count</b> (cell/ $\mu$ L, median, IQR) | 1160 (845-1815)  | 1640 (1170-2260)  |
| <b>Fibrinogen</b> (mg/dl; median, IQR)               | 387 (313-468)    | 355 (275-437)     |
| <b>D-dimer</b> (ng/ml; median, IQR)                  | 717 (419-1374)   | 867 (459-1450)    |
| <b>CRP</b> (mg/l)                                    | 21.8 (5.9-54.8)  | 5.5 (2.6-18.4)    |
| <b>LDH</b> (U/l)                                     | 218 (186-284)    | 209 (184-267)     |

P/F: perfusion/fraction of inspired oxygen. WBC: white blood count; CRP: c-reactive protein;  
LDH: lactate dehydrogenase
